# Supplementary material for: Synthesis of a hollow CeO2/Au/C hierarchical nanostructure for high catalytic activity and recyclability
Source: Royal Society of Chemistry journal article supplement (doi:10.1039/c6ra23521b), 2016-01-01
Supplement: c6ra23521b1.pdf [file c6ra23521b1.pdf]

## Figure supporting

Fig. S1 HRTEM images of the obtained (a)  $\text{SiO}_2/\text{CeO}_2$  and (b)  $\text{SiO}_2/\text{CeO}_2/\text{Au}$ .

Fig. S2 The EDX spectrum data for the obtained (a)  $\text{SiO}_2/\text{CeO}_2$ , (b)  $\text{SiO}_2/\text{CeO}_2/\text{Au}$  microspheres.

Fig. S3 SEM (a) and the elemental mapping images (b,c,d) of hollow  $\text{CeO}_2/\text{Au}/\text{C}$  microspheres.

Fig. S4 Nitrogen adsorption-desorption isotherm (a) and corresponding pore size distribution curve (b) of hollow  $\text{CeO}_2/\text{Au}/\text{C}$  microspheres.

Fig. S5 The UV-vis spectra of prepared  $\text{CeO}_2/\text{Au}$ ,  $\text{Au}/\text{C}$  and hollow  $\text{CeO}_2/\text{Au}/\text{C}$  nanostructures.

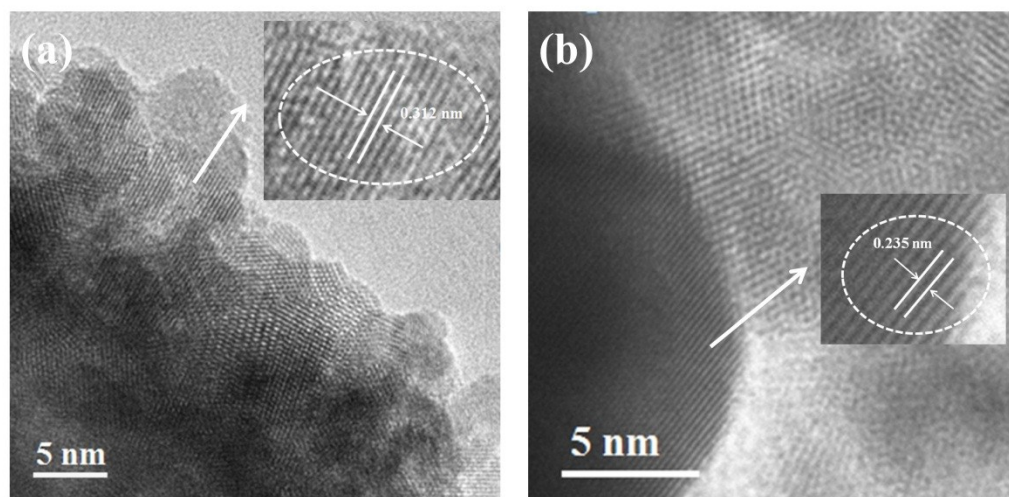

Fig. S1 HRTEM images of the obtained  $\text{SiO}_2/\text{CeO}_2$  (a) and  $\text{SiO}_2/\text{CeO}_2/\text{Au}$  (b).

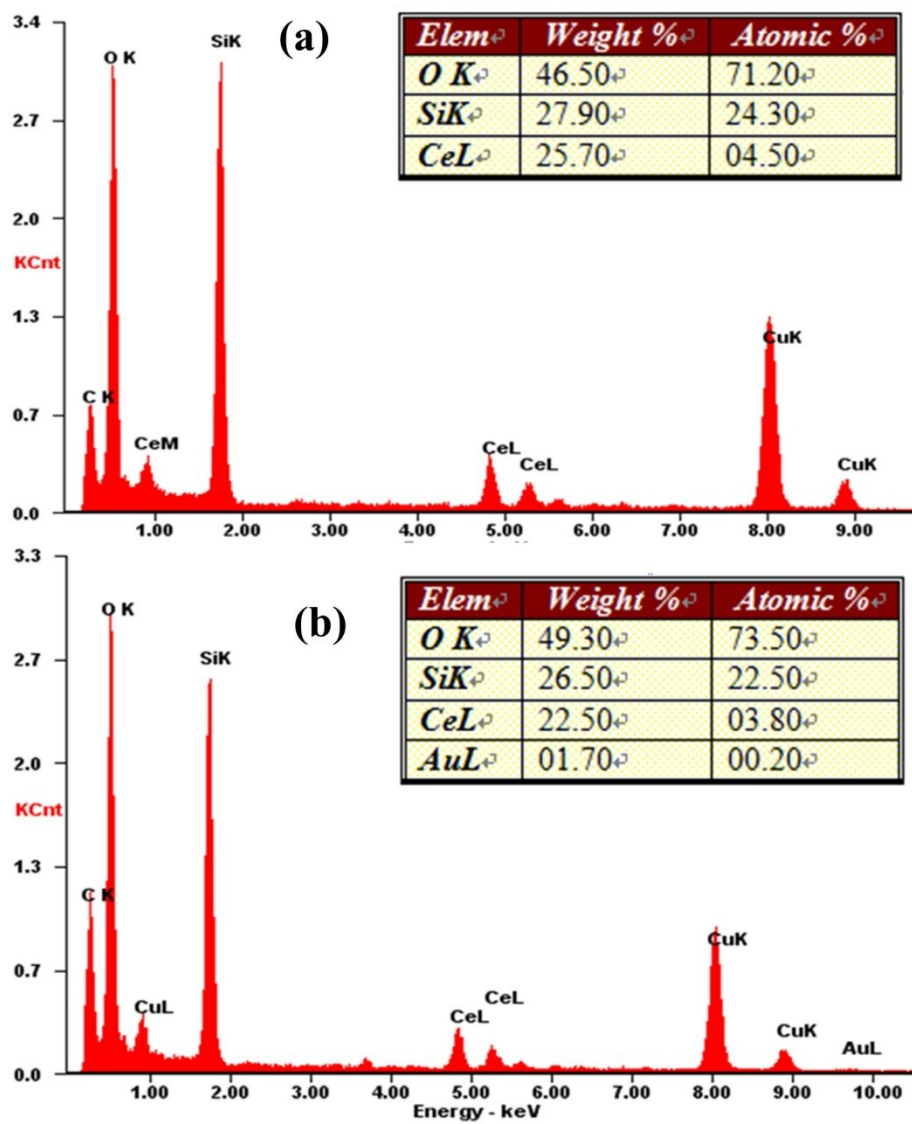

Fig. S2 The EDX spectrum data for the obtained (a) SiO<sub>2</sub>/CeO<sub>2</sub>, (b) SiO<sub>2</sub>/CeO<sub>2</sub>/Au microspheres.

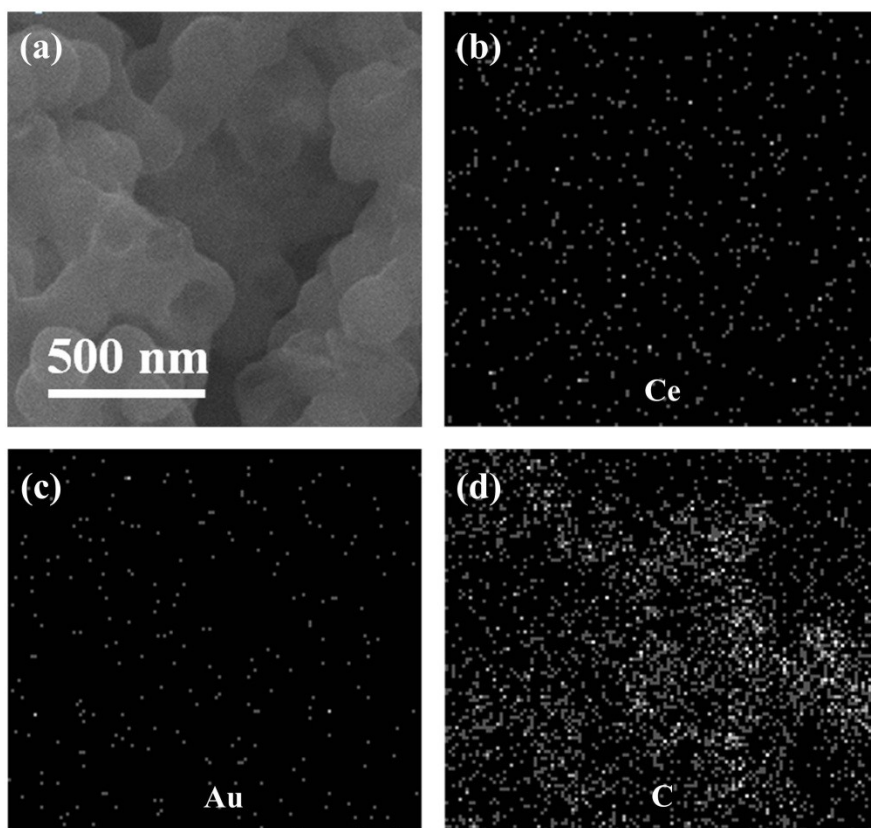

Fig. S3 SEM (a) and the elemental mapping images (b,c,d) of hollow  $\text{CeO}_2/\text{Au}/\text{C}$  microspheres.

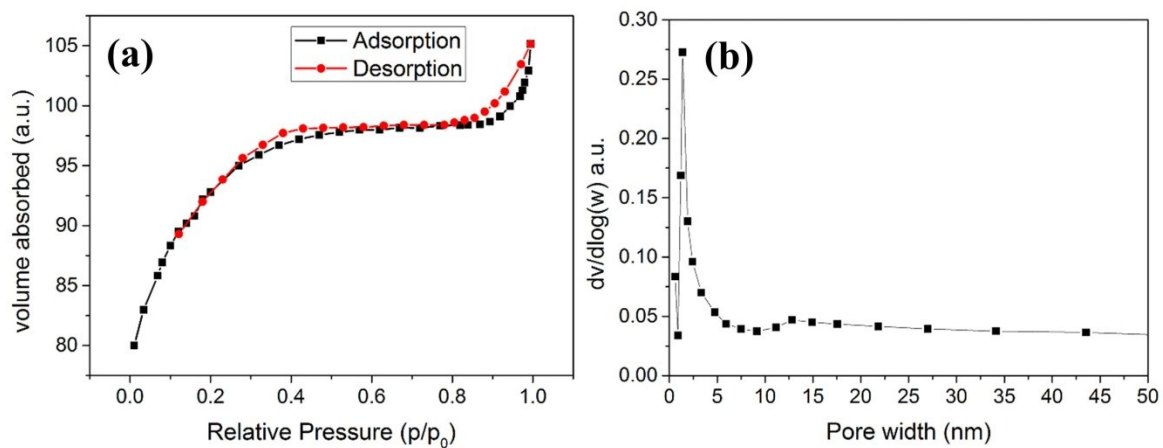

Fig. S4 Nitrogen adsorption-desorption isotherm (a) and corresponding pore size distribution curve (b) of hollow  $\text{CeO}_2/\text{Au}/\text{C}$  microspheres.

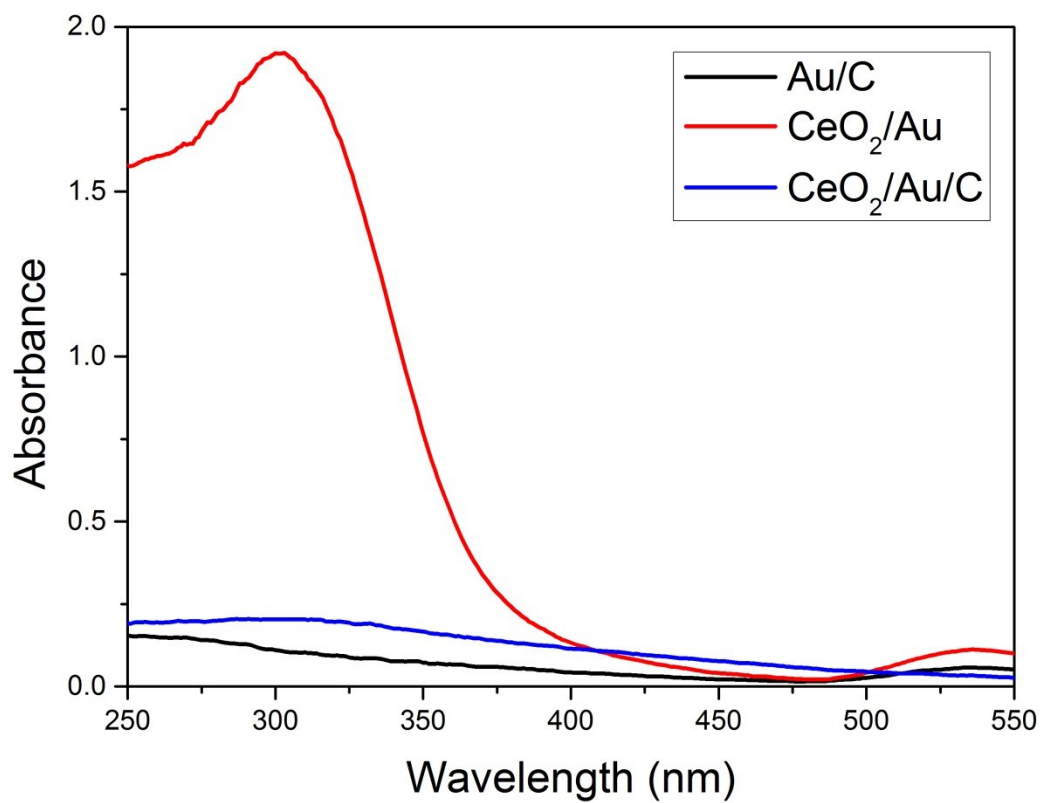

Fig. S5 The UV-vis spectra of prepared CeO<sub>2</sub>/Au, Au/C and hollow CeO<sub>2</sub>/Au/C nanostructures.
